# Supplementary material
Source: MDPI journal article supplement (https://www.mdpi.com/2571-550X/7/1/6)
Supplement: s1 [file s1]

Archive with 1 entries (1 files):
- quaternary-2604198-supplementary.pdf
